# Supplementary material
Source: PubMed Central journal article supplement (PMC2189628)
Supplement: amjpathol_ajpath.2008.070069_1.pdf [file amjpathol_ajpath.2008.070069_1.pdf]

Supplemental Figure 1

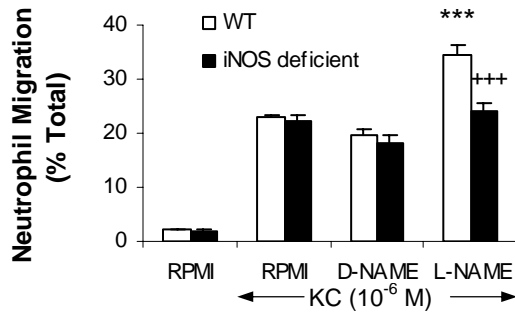

Effect of L-NAME on migration of iNOS-deficient mouse neutrophils to RPMI or KC (10<sup>-6</sup>M) over 3 h. Neutrophils were isolated from mouse peripheral blood from wild type or iNOS deficient mice according to Cotter et al (2001) and resuspended in RPMI, D-NAME or L-NAME and placed on filter membranes of chemotaxis chambers. Results are expressed as a percentage of the total number of neutrophils added to upper filters. Results are shown as mean  $\pm$  sem, n=4. Statistical analysis was carried out using one way ANOVA followed by Bonferroni's for multiple comparisons. \*\*\* $P$ <0.001 compared to KC control, +++ $P$ <0.001 compared to L-NAME in wild type neutrophils.
